# Supplementary material
Source: PubMed Central journal article supplement (PMC6810545)
Supplement: supp_table_1_dez157.pdf [file supp_table_1_dez157.pdf]

**Supplementary Table S1** Definition of scoring system, number of components, total score and components of Alternate Healthy Index (AHEI-2010), relative Mediterranean Diet Score (rMED) and Dietary Approaches to Stop Hypertension (DASH) scores.

|                           | Dietary quality indexes, scoring and criteria                                                                                     |                                                          |                                                |
|---------------------------|-----------------------------------------------------------------------------------------------------------------------------------|----------------------------------------------------------|------------------------------------------------|
|                           | AHEI-2010                                                                                                                         | rMED                                                     | DASH                                           |
| Scoring system            | Pre-definite cut points: 1–10                                                                                                     | tertiles by 1000 kcal/day: 1–3                           | Quintiles: 1–5                                 |
| Number of components      | 11                                                                                                                                | 9                                                        | 8                                              |
| Total score               | 110 points.                                                                                                                       | 18 points                                                | 40 points.                                     |
| Components                |                                                                                                                                   |                                                          |                                                |
| Vegetables                | ≥ 5 sv/d: 10 points                                                                                                               | Highest tertile sv/d: 3 points                           | Highest quintile: 5 points                     |
| Fruit                     | ≥ 4 sv/d: 10 points                                                                                                               | Including nuts; highest tertile sv/d: 3 points           | Highest quintile sv/d: 5 points                |
| Nuts and legumes          | ≥ 1 sv/d: 10 points                                                                                                               | Only legumes; highest tertile sv/d: 3 points             | Highest quintile sv/d: 5 points                |
| Fish                      | –                                                                                                                                 | Highest tertile sv/d: 3 points                           | –                                              |
| Whole grains              | Women ≥ 75 g/d: 10 points; men ≥ 90 g/d: 10 points                                                                                | Including refined grains; highest tertile sv/d: 3 points | Highest quintile sv/d: 5 points                |
| Dairy products            | –                                                                                                                                 | Lowest tertile sv/d: 3 points                            | Only low-fat; highest quintiles sv/d: 5 points |
| Red and processed meat    | ≥ 1.5 sv/d: 0 point                                                                                                               | Including white meat; lowest tertile sv/d: 3 points      | Lowest quintile sv/d: 5 points                 |
| Sugar sweetened beverages | Including fruit juice; ≥ 1 sv/d: 0 point                                                                                          | –                                                        | Lowest quintile sv/d: 5 points                 |
| Oils/fats                 | <i>trans</i> Fat: ≤ 0.5% of energy: 10 points and ≥ 4%: 0 points; EPA + DHA ≥ 250 mg: 10 points; PUFA: ≥ 10% of energy: 10 points | Olive oil; highest tertile sv/d: 3 points                | –                                              |
| Sodium                    | Lowest decile in mg/d: 10 points                                                                                                  | –                                                        | Lowest quintile in mg/d: 5 points              |
| Alcohol                   | Women 0.5–1.5 drinks: 10 points, men: 0.5–2.0 drinks: 10 points                                                                   | 5–25 g/d ethanol: 2 points                               | –                                              |

sv, serving
