# Supplementary material
Source: PubMed Central journal article supplement (PMC6810545)
Supplement: supp_table_2_dez157.pdf [file supp_table_2_dez157.pdf]

**Supplementary Table SII** Spearman's rho correlation coefficients between dietary indices.

| Dietary indices | rMED    | DASH    |
|-----------------|---------|---------|
| AHEI-2010       | 0.59    | 0.19    |
| P-value         | < 0.001 | 0.007   |
| rMED            | 1.0     | 0.26    |
| P-value         |         | < 0.001 |
