# Supplementary material
Source: PubMed Central journal article supplement (PMC6810545)
Supplement: supp_table_3_dez157.pdf [file supp_table_3_dez157.pdf]

**Supplementary Table SIII** Multivariate adjusted<sup>1</sup> associations of specific components of DASH and total motile sperm count.

| Specific component of DASH | $\beta$ coefficient (95%CI) | P-value |
|----------------------------|-----------------------------|---------|
| Fruits                     | 0.11                        | 0.059   |
| Vegetables                 | 0.01                        | 0.81    |
| Nuts and legumes           | 0.02                        | 0.72    |
| Whole grains               | 0.02                        | 0.81    |
| Low-fat dairy              | 0.01                        | 0.92    |
| Sodium                     | 0.14                        | 0.17    |
| Red and processed meats    | 0.02                        | 0.75    |
| Sweetened beverages        | 0.02                        | 0.66    |

<sup>1</sup> Adjusted for calories intake (kcal/day), physical activity (h/week), presence of varicocele (yes/no), abstinence time (hours) and time to start of analysis.
